# Supplementary material for: Uncoupling of microbial community structure and function in decomposing litter across beech forest ecosystems in Central Europe
Source: PubMed Central journal article supplement — Sci Rep. 2014 Nov 12;4:7014. doi: 10.1038/srep07014 (PMC4228342; doi:10.1038/srep07014), 2014-11-12
Supplement: srep07014-s1.pdf [file srep07014-s1.pdf]

## Supplementary information

### Uncoupling of microbial community structure and function in decomposing litter across beech forest ecosystems in Central Europe

Witoon Purahong, Michael Schloter, Marek J Pecyna, Danuta Kapturska, Veronika Däumlich, Sanchit Mital, François Buscot, Martin Hofrichter, Jessica LM Gutknecht, Dirk Krüger

**Table S1.** Statistical values from 2-way ANOVA of all parameters used in this study. Data on oxidative enzyme activities are derived from Purahong et al.<sup>1</sup>.

| Parameter                                             | 2 way ANOVA                                      |                                                   |                                                  |
|-------------------------------------------------------|--------------------------------------------------|---------------------------------------------------|--------------------------------------------------|
|                                                       | FMPs                                             | DAI                                               | FMPs × DAI                                       |
| Fungal : Bacteria ratio                               | <b><i>F</i> = 28.47,<br/><i>P</i> &lt; 0.001</b> | <b><i>F</i> = 77.83,<br/><i>P</i> &lt; 0.001</b>  | <b><i>F</i> = 16.87,<br/><i>P</i> &lt; 0.001</b> |
| Total microbial biomass                               | <b><i>F</i> = 8.791,<br/><i>P</i> = 0.001</b>    | <b><i>F</i> = 25.46,<br/><i>P</i> &lt; 0.001</b>  | <b><i>F</i> = 4.21,<br/><i>P</i> = 0.005</b>     |
| i15:0, Gram-positive bacteria biomass                 | <b><i>F</i> = 37.04,<br/><i>P</i> &lt; 0.001</b> | <b><i>F</i> = 68.10,<br/><i>P</i> &lt; 0.001</b>  | <b><i>F</i> = 19.43,<br/><i>P</i> &lt; 0.001</b> |
| 16:1ω7c, Gram negative bacteria biomass               | <b><i>F</i> = 21.50,<br/><i>P</i> &lt; 0.001</b> | <b><i>F</i> = 44.49,<br/><i>P</i> &lt; 0.001</b>  | <b><i>F</i> = 8.63,<br/><i>P</i> &lt; 0.001</b>  |
| 10Me16:0, actinobacteria biomass                      | <b><i>F</i> = 51.13,<br/><i>P</i> &lt; 0.001</b> | <b><i>F</i> = 120.10,<br/><i>P</i> &lt; 0.001</b> | <b><i>F</i> = 40.69,<br/><i>P</i> &lt; 0.001</b> |
| 17:0 cyclo and 19:0 cyclo, anaerobic bacteria biomass | <b><i>F</i> = 23.70,<br/><i>P</i> &lt; 0.001</b> | <b><i>F</i> = 37.05,<br/><i>P</i> &lt; 0.001</b>  | <b><i>F</i> = 11.50,<br/><i>P</i> &lt; 0.001</b> |
| 18:2ω6,9c, general fungal biomass                     | <b><i>F</i> = 19.99,<br/><i>P</i> &lt; 0.001</b> | <b><i>F</i> = 48.38,<br/><i>P</i> &lt; 0.001</b>  | <b><i>F</i> = 10.91,<br/><i>P</i> &lt; 0.001</b> |
| Cellobiohydrolase                                     | <i>F</i> = 0.75,<br><i>P</i> = 0.483             | <b><i>F</i> = 11.33,<br/><i>P</i> &lt; 0.001</b>  | <b><i>F</i> = 2.84,<br/><i>P</i> = 0.031</b>     |
| Xylosidase                                            | <b><i>F</i> = 6.65,<br/><i>P</i> = 0.005</b>     | <b><i>F</i> = 6.87,<br/><i>P</i> = 0.002</b>      | <i>F</i> = 1.12,<br><i>P</i> = 0.379             |
| β-glucosidase                                         | <i>F</i> = 1.92,<br><i>P</i> = 0.169             | <b><i>F</i> = 9.75,<br/><i>P</i> &lt; 0.001</b>   | <b><i>F</i> = 3.35,<br/><i>P</i> = 0.015</b>     |
| N-acetylglucosaminidase                               | <b><i>F</i> = 4.61,<br/><i>P</i> = 0.020</b>     | <i>F</i> = 1.76,<br><i>P</i> = 0.183              | <b><i>F</i> = 7.11,<br/><i>P</i> &lt; 0.001</b>  |
| Acid phosphatase                                      | <b><i>F</i> = 5.01,<br/><i>P</i> = 0.015</b>     | <i>F</i> = 1.31,<br><i>P</i> = 0.295              | <b><i>F</i> = 7.82,<br/><i>P</i> &lt; 0.001</b>  |
| Laccase                                               | <b><i>F</i> = 16.82,<br/><i>P</i> &lt; 0.001</b> | <b><i>F</i> = 3.40,<br/><i>P</i> = 0.034</b>      | <i>F</i> = 1.29,<br><i>P</i> = 0.301             |
| Peroxidase                                            | <i>F</i> = 1.19,<br><i>P</i> = 0.320             | <b><i>F</i> = 5.39,<br/><i>P</i> = 0.006</b>      | <i>F</i> = 0.80,<br><i>P</i> = 0.582             |
| Manganese peroxidase                                  | <b><i>F</i> = 5.90,<br/><i>P</i> = 0.008</b>     | <i>F</i> = 1.58,<br><i>P</i> = 0.220              | <i>F</i> = 0.78,<br><i>P</i> = 0.593             |

**Table S2.** Correlations among total PLFA, PLFA indicators and enzyme activities (significant values ( $P < 0.05$ ), are given in bold).

|                    | total_bior   | Actinomy      | anaerobic     | Gram+        | Gram-        | fungi  | MNP    | Per          | L      | P            | X            | B            | N            |
|--------------------|--------------|---------------|---------------|--------------|--------------|--------|--------|--------------|--------|--------------|--------------|--------------|--------------|
| total_biomass      |              |               |               |              |              |        |        |              |        |              |              |              |              |
| Actinomycetes      |              |               |               |              |              |        |        |              |        |              |              |              |              |
| anaerobic_bacteria |              | <b>0.954</b>  |               |              |              |        |        |              |        |              |              |              |              |
| Gram+              |              | <b>0.956</b>  | <b>0.967</b>  |              |              |        |        |              |        |              |              |              |              |
| Gram-              |              | <b>0.861</b>  | <b>0.908</b>  | <b>0.930</b> |              |        |        |              |        |              |              |              |              |
| fungi              |              | <b>0.768</b>  | <b>0.823</b>  | <b>0.841</b> | <b>0.960</b> |        |        |              |        |              |              |              |              |
| MNP                | 0.154        | 0.170         | 0.159         | 0.179        | 0.158        | 0.105  |        |              |        |              |              |              |              |
| Per                | -0.085       | -0.243        | -0.225        | -0.245       | -0.158       | 0.011  | 0.095  |              |        |              |              |              |              |
| L                  | -0.216       | <b>-0.336</b> | <b>-0.362</b> | -0.279       | -0.281       | -0.145 | -0.119 | <b>0.480</b> |        |              |              |              |              |
| P                  | 0.121        | 0.112         | 0.217         | 0.204        | 0.138        | 0.073  | -0.009 | -0.024       | -0.022 |              |              |              |              |
| X                  | 0.116        | -0.093        | -0.045        | 0.028        | 0.089        | 0.135  | 0.297  | 0.146        | 0.102  | 0.086        |              |              |              |
| B                  | <b>0.316</b> | 0.115         | 0.247         | 0.262        | <b>0.329</b> | 0.309  | 0.086  | 0.209        | 0.109  | <b>0.791</b> | <b>0.369</b> |              |              |
| N                  | -0.046       | -0.241        | -0.099        | -0.121       | -0.036       | -0.045 | 0.037  | -0.026       | 0.025  | <b>0.429</b> | <b>0.600</b> | <b>0.497</b> |              |
| C                  | -0.068       | -0.266        | -0.168        | -0.172       | -0.089       | -0.013 | 0.289  | <b>0.443</b> | 0.221  | 0.220        | <b>0.688</b> | <b>0.533</b> | <b>0.530</b> |

Abbreviations: MNP = Mn-peroxidase, Per = general peroxidase, L = laccase, P = acid phosphatase, X = Xylosidase, B =  $\beta$ -glucosidase, N = N-acetylglucosaminidase

**Table S3.** Information on the litter composition for individual forest sites<sup>1</sup>.

| Forest management practice          | Litter composition (%) |                 |                     |
|-------------------------------------|------------------------|-----------------|---------------------|
|                                     | <i>Fagus sylvatica</i> | <i>Acer</i> sp. | <i>Fraxinus</i> sp. |
| Beech age-class forest (BA)         | 85                     | 10              | 5                   |
| Beech selection cutting forest (BS) | 90                     | 10              | 0                   |
| Beech unmanaged forest (BU)         | 100                    | 0               | 0                   |

**Table S4.** Initial chemical composition of dried leaf litter under different forest management practices (Mean±SD, n = 3) <sup>1</sup>.

| <b>Nutrient</b>             | <b>Age-class beech forest (BA)</b> | <b>Selection cutting beech forest (BS)</b> | <b>Unmanaged beech forest (BU)</b> |
|-----------------------------|------------------------------------|--------------------------------------------|------------------------------------|
| Total C (%)                 | 47.61±0.17                         | 47.34±0.16                                 | 48.81±0.22                         |
| Total N (%)                 | 0.97±0.01                          | 1.04±0.00                                  | 0.84±0.03                          |
| C/N                         | 48.92±0.20                         | 45.52±0.15                                 | 58.38±2.18                         |
| Total lignin/N              | 43.13±0.25                         | 39.74±0.00                                 | 56.27±1.90                         |
| Initial Mg (µg/g dry mass ) | 204.00±50.27                       | 294.33±197.28                              | 157.93±54.19                       |
| Initial K (µg/g dry mass )  | 3076.67±545.01                     | 4596.67±2500.11                            | 2443.33±120.97                     |
| Initial Ca (µg/g dry mass ) | 593.33±142.55                      | 964.33±576.11                              | 344.33±70.61                       |
| Initial P (µg/g dry mass )  | 187.67±41.50                       | 152.67±27.43                               | 157.33±20.84                       |
| Initial Mn (µg/g dry mass ) | 32.87±9.64                         | 26.47±11.65                                | 20.53±5.56                         |
| Initial Fe (µg/g dry mass ) | 5.60±2.52                          | 4.67±2.80                                  | 7.37±9.14                          |
| Initial Cu (µg/g dry mass ) | 0.91±0.37                          | 0.62±0.07                                  | 0.40±0.04                          |
| Initial Co (µg/g dry mass ) | 0.01±0.00                          | 0.02±0.01                                  | 0.01±0.00                          |
| Initial V (µg/g dry mass )  | 0.02±0.00                          | 0.02±0.00                                  | 0.02±0.02                          |

**Table S5.** Correlation among different PLFA markers for (A) Gram-positive bacteria (15:0 iso, 15:0 ante, 16:0 iso, 17:0 iso and 17:0 ante), (B) Gram-negative bacteria (16:1 $\omega$ 5c, 16:1 $\omega$ 7c and 16:1 $\omega$ 9c) and (C) general fungi (18:1 $\omega$ 9, 18:2 $\omega$ 6,9c and 18:3 $\omega$ 3,6,9c). All correlations were significant ( $P < 0.001$ ).

(A) Gram-positive bacteria

|       | a15:0       | i15:0       | i16:0       | a17:0       |
|-------|-------------|-------------|-------------|-------------|
| a15:0 |             |             |             |             |
| i15:0 | <b>0.97</b> |             |             |             |
| i16:0 | <b>0.98</b> | <b>0.99</b> |             |             |
| a17:0 | <b>0.98</b> | <b>0.98</b> | <b>1.00</b> |             |
| i17:0 | <b>0.93</b> | <b>0.99</b> | <b>0.98</b> | <b>0.97</b> |

(B) Gram-negative bacteria

|                  | 16:1 $\omega$ 5c | 16:1 $\omega$ 7c |
|------------------|------------------|------------------|
| 16:1 $\omega$ 5c |                  |                  |
| 16:1 $\omega$ 7c | <b>0.94</b>      |                  |
| 16:1 $\omega$ 9c | <b>0.98</b>      | <b>0.97</b>      |

(C) General fungi

|                      | 18:1 $\omega$ 9 | 18:2 $\omega$ 6,9c |
|----------------------|-----------------|--------------------|
| 18:1 $\omega$ 9      |                 |                    |
| 18:2 $\omega$ 6,9c   | <b>0.97</b>     |                    |
| 18:3 $\omega$ 3,6,9c | <b>0.95</b>     | <b>0.94</b>        |

**Figure S1.** Percent of initial nitrogen (N), carbon (C), calcium (Ca), potassium (K), magnesium (Mg), and phosphorous (P) during decomposition under different forest system management practices<sup>1</sup>. European beech age-class forest (red, BA), European beech selection cutting forest (green, BS) and unmanaged deciduous forest reserves dominated by European beech (black, BU) (mean  $\pm$  SD, n = 3).

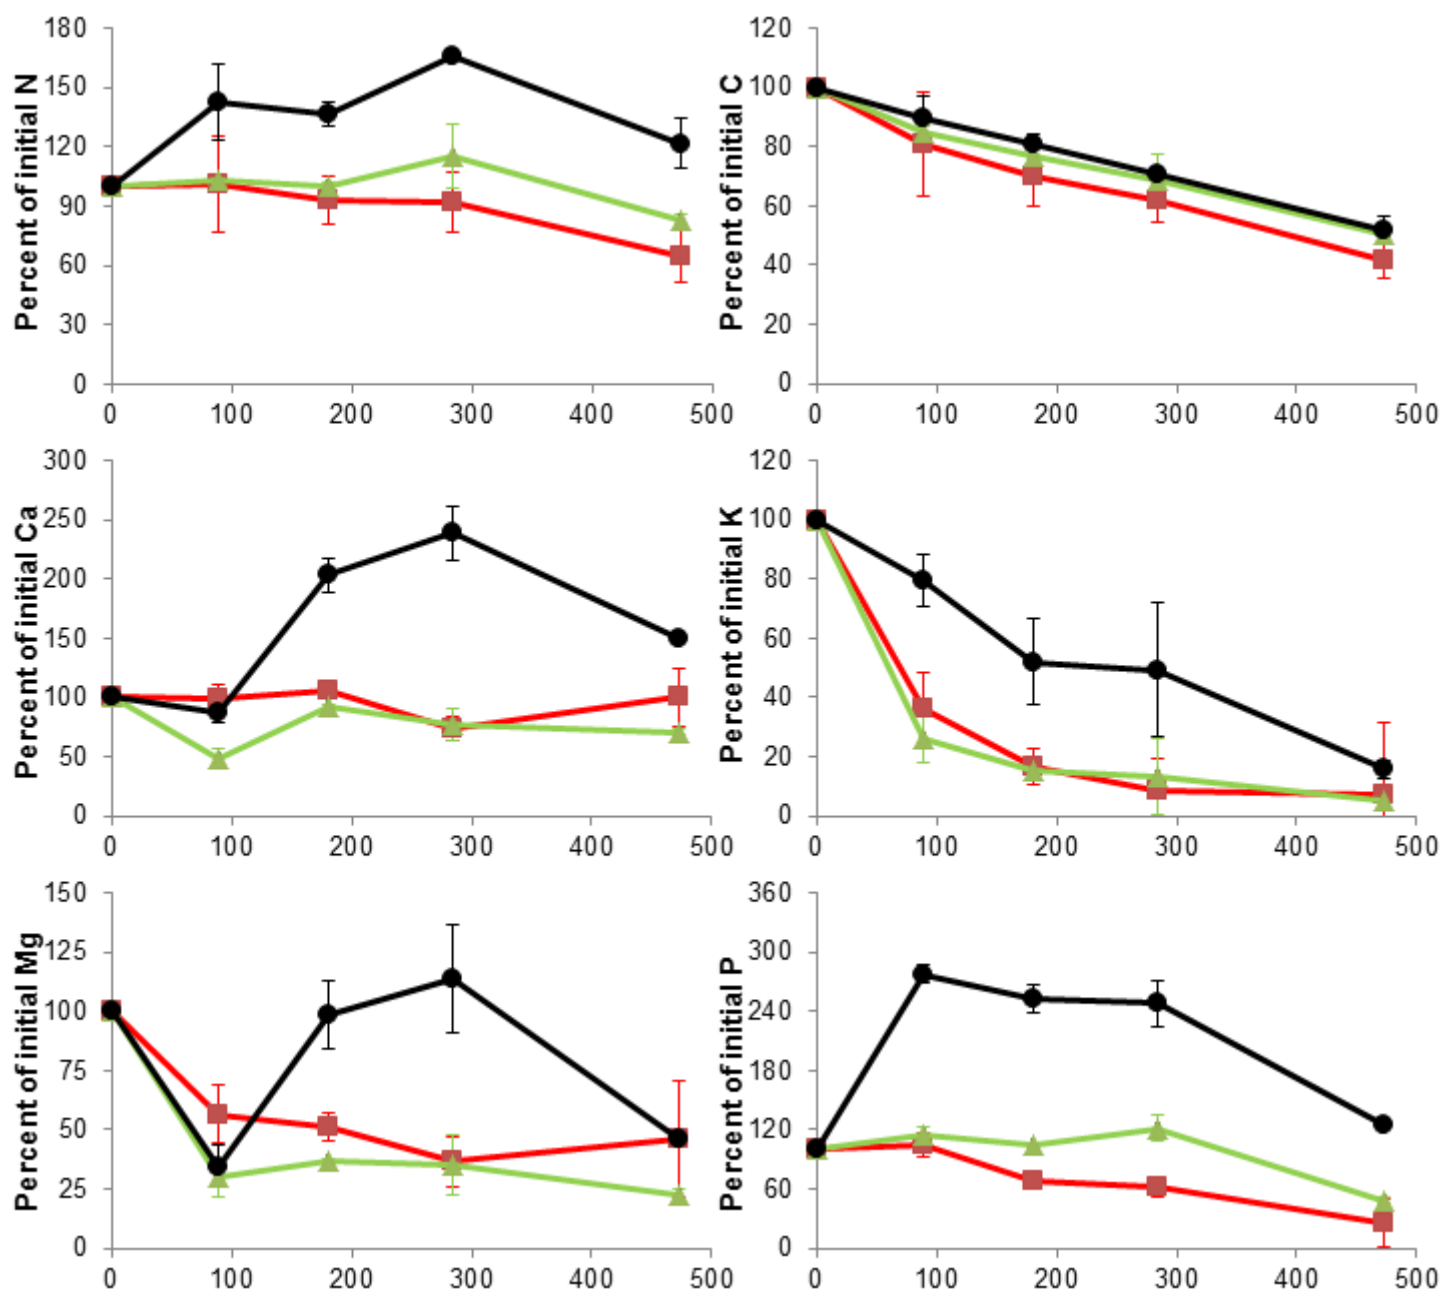

## Reference

1. Purahong, W. et al. Influence of different forest system management practices on leaf litter decomposition rates, nutrient dynamics and the activity of ligninolytic enzymes: a case study from Central European forests. *PLoS ONE* 9: e93700 (2014).
